# Supplementary material for: The extraction method for the separation of lithium isotopes using B12C4/B15C5/B18C6-ionic liquid systems
Source: Royal Society of Chemistry journal article supplement (doi:10.1039/d2nj05369a), 2022-12-12
Supplement: d2nj05369a1.pdf [file d2nj05369a1.pdf]

## Extraction separation of lithium isotopes by B12C4/B15C5/B18C6- ionic liquid systems

Xiaolong Zhou, Pengrui Zhang, Qingfen Meng, Lianjing Mao, Huiqun Ju, Fei Shao, Yan Jing,  
Yongzhong Jia, Shuxuan Wang, Xingwu Zou, Jinhe Sun

Journal: *New Journal of Chemistry*

### 3.1: The effect of crown ethers in different ionic liquids.

**Table S1:** The effect of crown ethers in different ionic liquids.

| B12C4                     |       |          |                                 |                                  |
|---------------------------|-------|----------|---------------------------------|----------------------------------|
| ionic liquids             | E(%)  | $\alpha$ | $\delta^7\text{Li}_{\text{aq}}$ | $\delta^7\text{Li}_{\text{org}}$ |
| [EMIm][NTf <sub>2</sub> ] | 23.35 | 1.023    | 6.47                            | -15.72                           |
| [BMIm][NTf <sub>2</sub> ] | 19.6  | 1.021    | 6.70                            | -13.96                           |
| [HMIm][NTf <sub>2</sub> ] | 19.77 | 1.021    | 6.94                            | -13.44                           |
| [OMIm][NTf <sub>2</sub> ] | 18.1  | 1.022    | 6.62                            | -14.91                           |
| [DMIm][NTf <sub>2</sub> ] | 18.2  | 1.023    | 6.79                            | -15.87                           |
| B15C5                     |       |          |                                 |                                  |
| ionic liquids             | E(%)  | $\alpha$ | $\delta^7\text{Li}_{\text{aq}}$ | $\delta^7\text{Li}_{\text{org}}$ |
| [EMIm][NTf <sub>2</sub> ] | 40.88 | 1.024    | 14.81                           | -8.97                            |
| [BMIm][NTf <sub>2</sub> ] | 37.77 | 1.025    | 14.56                           | -9.99                            |
| [HMIm][NTf <sub>2</sub> ] | 37.37 | 1.025    | 14.65                           | -10.07                           |
| [OMIm][NTf <sub>2</sub> ] | 34.95 | 1.026    | 14.69                           | -10.90                           |
| [DMIm][NTf <sub>2</sub> ] | 35.51 | 1.027    | 14.65                           | -11.60                           |
| B18C6                     |       |          |                                 |                                  |
| ionic liquids             | E(%)  | $\alpha$ | $\delta^7\text{Li}_{\text{aq}}$ | $\delta^7\text{Li}_{\text{org}}$ |
| [EMIm][NTf <sub>2</sub> ] | 38.12 | 1.0098   | 5.95                            | -3.79                            |
| [BMIm][NTf <sub>2</sub> ] | 34.94 | 1.0103   | 6.08                            | -4.13                            |
| [HMIm][NTf <sub>2</sub> ] | 35.32 | 1.0097   | 5.85                            | -3.84                            |
| [OMIm][NTf <sub>2</sub> ] | 35.91 | 1.0097   | 5.85                            | -3.81                            |
| [DMIm][NTf <sub>2</sub> ] | 35.48 | 1.0099   | 6.00                            | -3.90                            |

### 3.2: The effect of crown ethers in different solvents.

**Table S2:** The effect of crown ethers in different solvents.

| B12C4                                   |       |          |                                 |                                  |
|-----------------------------------------|-------|----------|---------------------------------|----------------------------------|
| volume ratio of ionic liquid to anisole | E(%)  | $\alpha$ | $\delta^7\text{Li}_{\text{aq}}$ | $\delta^7\text{Li}_{\text{org}}$ |
| 0:1                                     | 19.97 | 1.023    | 13.96                           | -11.95                           |
| 2:8                                     | 22.14 | 1.021    | 6.70                            | -14.36                           |
| 3:7                                     | 23.35 | 1.023    | 6.47                            | -15.72                           |
| 4:6                                     | 23.02 | 1.018    | 6.34                            | -11.14                           |
| 5:5                                     | 19.97 | 1.023    | 13.96                           | -11.95                           |

  

| B15C5                                   |       |          |                                 |                                  |
|-----------------------------------------|-------|----------|---------------------------------|----------------------------------|
| volume ratio of ionic liquid to anisole | E(%)  | $\alpha$ | $\delta^7\text{Li}_{\text{aq}}$ | $\delta^7\text{Li}_{\text{org}}$ |
| 0:1                                     | 37.15 | 1.024    | 13.78                           | -13.34                           |
| 2:8                                     | 39.94 | 1.025    | 15.12                           | -9.83                            |
| 3:7                                     | 40.88 | 1.024    | 14.81                           | -8.97                            |
| 4:6                                     | 40.61 | 1.025    | 14.99                           | -9.59                            |
| 5:5                                     | 38.40 | 1.025    | 14.99                           | -9.54                            |

  

| B18C6                                   |       |          |                                 |                                  |
|-----------------------------------------|-------|----------|---------------------------------|----------------------------------|
| volume ratio of ionic liquid to anisole | E(%)  | $\alpha$ | $\delta^7\text{Li}_{\text{aq}}$ | $\delta^7\text{Li}_{\text{org}}$ |
| 0:1                                     | 34.44 | 1.0099   | 5.91                            | -4.06                            |
| 2:8                                     | 37.79 | 1.009    | 5.89                            | -3.95                            |
| 3:7                                     | 38.12 | 1.0098   | 5.95                            | -3.97                            |
| 4:6                                     | 37.51 | 1.0099   | 5.93                            | -3.93                            |
| 5:5                                     | 36.47 | 1.0094   | 5.85                            | -3.54                            |

### 3.3: The effect of crown ethers with different concentration.

**Table S3:** The effect of crown ethers with different concentration.

| B12C4                     |       |          |                                 |                                  |
|---------------------------|-------|----------|---------------------------------|----------------------------------|
| crown ether concentration | E(%)  | $\alpha$ | $\delta^7\text{Li}_{\text{aq}}$ | $\delta^7\text{Li}_{\text{org}}$ |
| 0.2                       | 8.52  | 1.016    | 3.88                            | -12.15                           |
| 0.4                       | 18.12 | 1.019    | 5.61                            | -13.05                           |
| 0.5                       | 23.35 | 1.023    | 6.47                            | -15.72                           |
| 0.6                       | 24.78 | 1.020    | 7.18                            | -12.79                           |
| 0.8                       | 29.23 | 1.022    | 9.38                            | -12.05                           |
| 1.0                       | 36.54 | 1.022    | 10.82                           | -11.25                           |

  

| B15C5                     |       |          |                                 |                                  |
|---------------------------|-------|----------|---------------------------------|----------------------------------|
| crown ether concentration | E(%)  | $\alpha$ | $\delta^7\text{Li}_{\text{aq}}$ | $\delta^7\text{Li}_{\text{org}}$ |
| 0.2                       | 13.6  | 1.018    | 7.46                            | -10.18                           |
| 0.4                       | 30.62 | 1.022    | 12.46                           | -9.27                            |
| 0.5                       | 40.88 | 1.024    | 14.81                           | -8.97                            |
| 0.6                       | 43.28 | 1.024    | 16.99                           | -6.66                            |
| 0.8                       | 56.16 | 1.025    | 21.07                           | -3.81                            |

  

| B18C6                     |       |          |                                 |                                  |
|---------------------------|-------|----------|---------------------------------|----------------------------------|
| crown ether concentration | E(%)  | $\alpha$ | $\delta^7\text{Li}_{\text{aq}}$ | $\delta^7\text{Li}_{\text{org}}$ |
| 0.2                       | 11.26 | 1.0099   | 3.92                            | -5.90                            |
| 0.4                       | 29.40 | 1.0100   | 5.58                            | -4.35                            |
| 0.5                       | 38.12 | 1.0098   | 5.95                            | -3.79                            |
| 0.6                       | 40.48 | 1.0100   | 6.62                            | -3.30                            |
| 0.8                       | 51.86 | 1.0099   | 7.72                            | -2.13                            |
| 1.0                       | 62.17 | 1.0099   | 8.47                            | -1.98                            |

### 3.4: The effect of crown ethers with different lithium salts.

**Table S4:** The effect of crown ethers with different lithium salts.

| B12C4              |       |          |                                 |                                  |
|--------------------|-------|----------|---------------------------------|----------------------------------|
| lithium salts      | E(%)  | $\alpha$ | $\delta^7\text{Li}_{\text{aq}}$ | $\delta^7\text{Li}_{\text{org}}$ |
| LiNTf <sub>2</sub> | 23.35 | 1.023    | 6.47                            | -15.72                           |
| LiClO <sub>4</sub> | 10.99 | 1.025    | 4.56                            | -20.37                           |
| LiI                | 8.64  | 1.026    | 7.53                            | -17.87                           |
| LiBr               | 2.61  | 1.026    | 7.96                            | -17.65                           |
| LiCl               | 0.98  | 1.026    | 8.03                            | -17.13                           |
| B15C5              |       |          |                                 |                                  |
| lithium salts      | E(%)  | $\alpha$ | $\delta^7\text{Li}_{\text{aq}}$ | $\delta^7\text{Li}_{\text{org}}$ |
| LiNTf <sub>2</sub> | 40.88 | 1.024    | 14.81                           | -8.97                            |
| LiClO <sub>4</sub> | 34.52 | 1.025    | 15.26                           | -9.59                            |
| LiI                | 30.53 | 1.025    | 14.85                           | -9.61                            |
| LiBr               | 25.85 | 1.025    | 14.97                           | -9.58                            |
| LiCl               | 24.59 | 1.024    | 14.80                           | -9.47                            |
| B18C6              |       |          |                                 |                                  |
| lithium salts      | E(%)  | $\alpha$ | $\delta^7\text{Li}_{\text{aq}}$ | $\delta^7\text{Li}_{\text{org}}$ |
| LiNTf <sub>2</sub> | 38.12 | 1.0098   | 5.95                            | -3.79                            |
| LiClO <sub>4</sub> | 16.82 | 1.0093   | 8.4                             | -4.38                            |
| LiI                | 11.37 | 1.0091   | 7.90                            | -1.18                            |
| LiBr               | 9.73  | 1.0092   | 8.33                            | -0.87                            |
| LiCl               | 6.85  | 1.0094   | 8.43                            | -0.94                            |

### 3.3: The effect of crown ethers with different concentration.

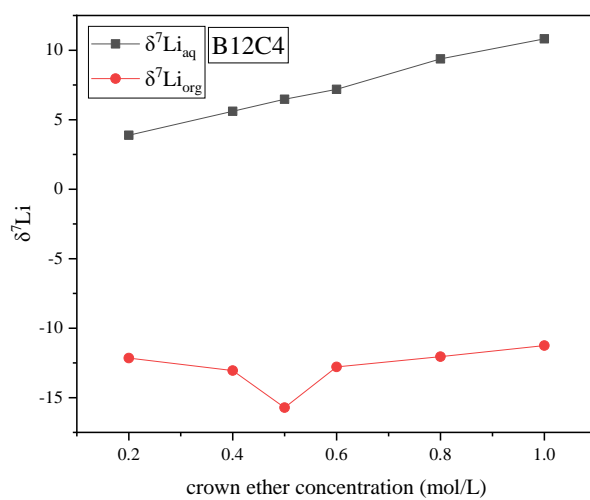

**Figure S1:** The  $\delta^7\text{Li}$  of B12C4 system with different concentration.

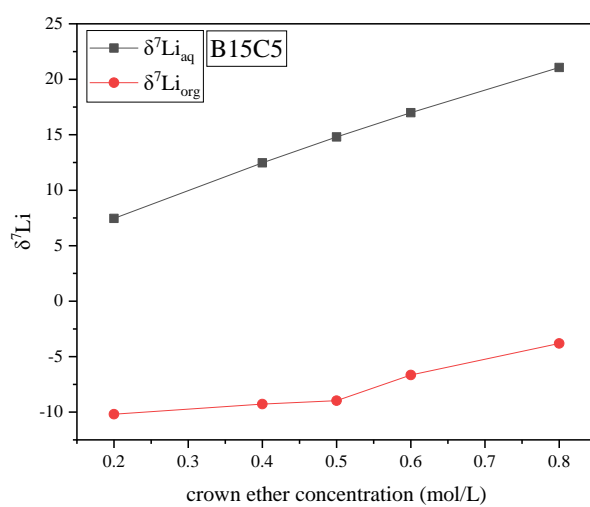

**Figure S2:** The  $\delta^7\text{Li}$  of B15C5 system with different concentration.

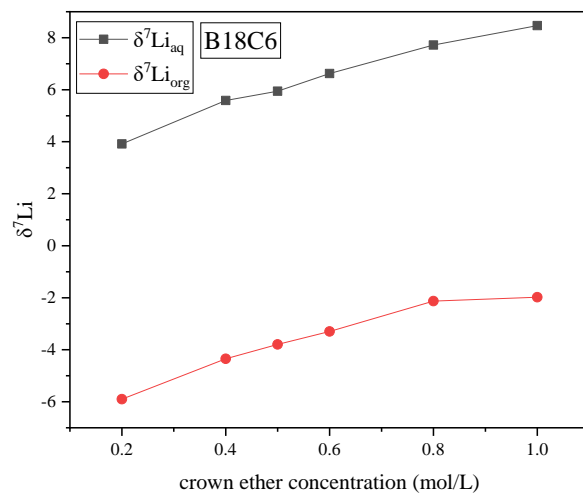

**Figure S3:** The  $\delta^7\text{Li}$  of B18C6 system with different concentration.
